# Supplementary material for: Fabrication of magnesium oxide nanoparticles by solvent alteration and their bactericidal applications
Source: Royal Society of Chemistry journal article supplement (doi:10.1039/c9tb00782b), 2019-01-01
Supplement: c9tb00782b1.pdf [file c9tb00782b1.pdf]

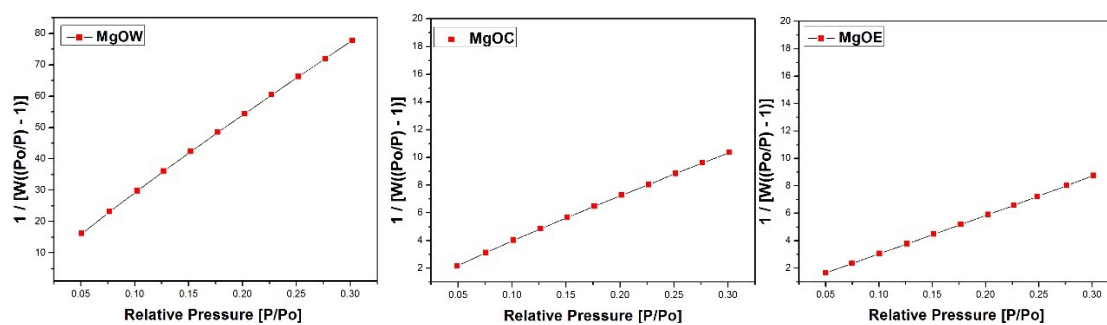

Figure S1 The multi point BET isotherm plots for MgOW, MgOC and MgOE indicating difference in slope of the isotherm plot

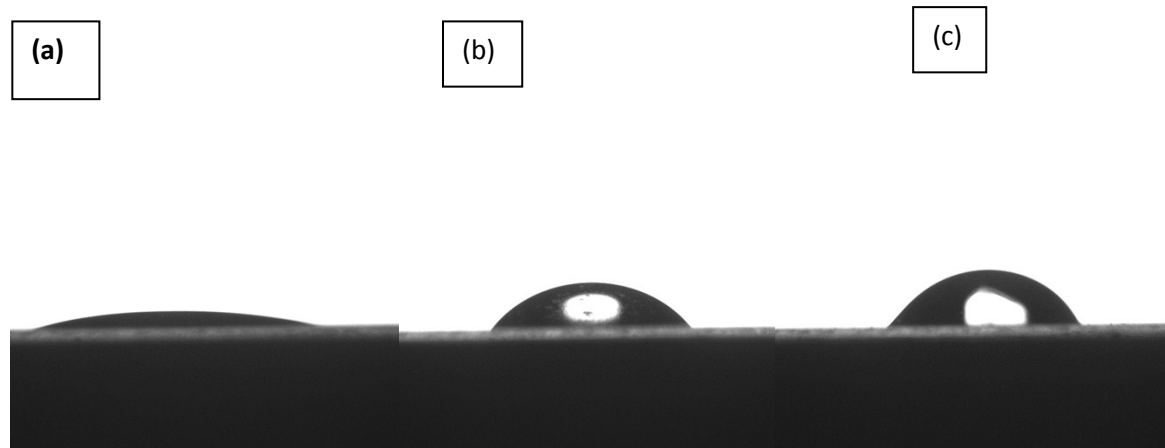

Figure S2 Contact angle of (a) water, (b) aqueous CTAB solution and (c) Ethanol

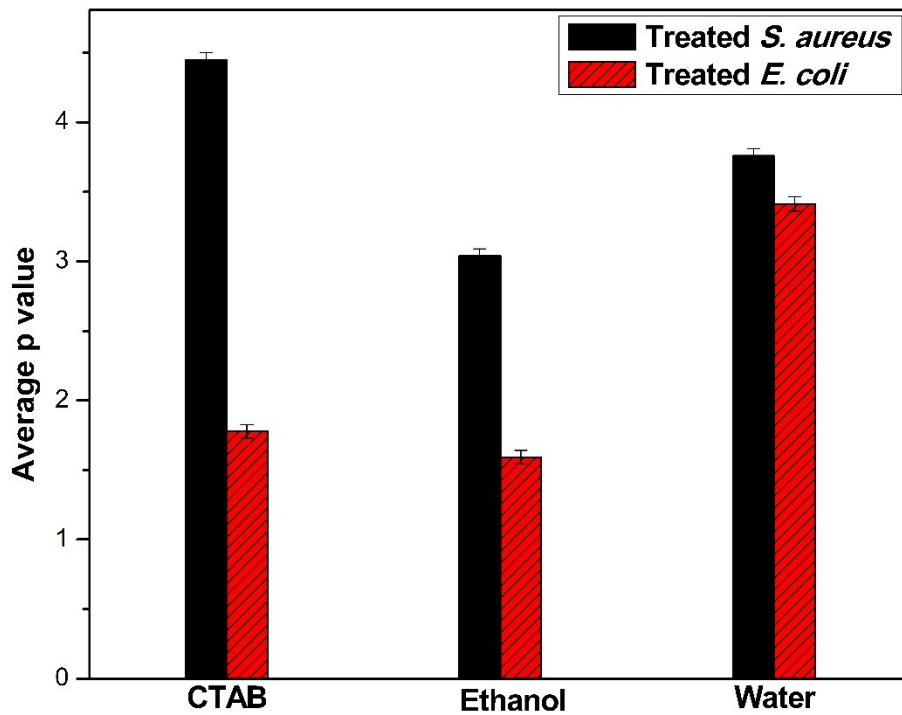

Figure S3 Average p values for all the solvents in *S. aureus* and *E. coli* indicating the lowest value for MgOE for both the cases

#### CFU Reduction:

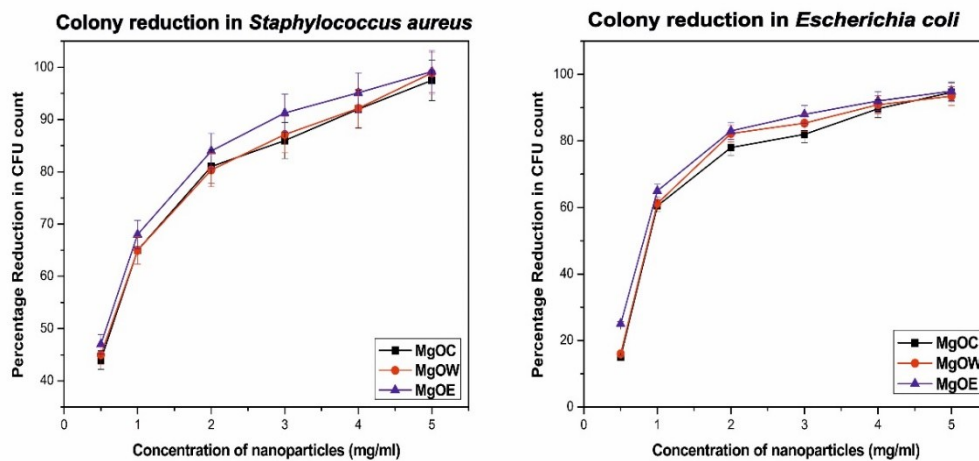

Figure S4 Percentage reduction in colony forming unit (CFU) count with increasing concentration of (a)MgOW (b) MgOC and (c) MgOE nanoparticles

Table S1 Doubling time of hydrogen peroxide generation with time and concentration of nanoparticles

|                  | Type of solution | Doubling time (h) |
|------------------|------------------|-------------------|
| <i>S. aureus</i> | 1 mg/ml MgOE     | 19                |
|                  | 1 mg/ml MgOW     | 20.97             |
|                  | 1 mg/ml MgOC     | 20.15             |
|                  | 5 mg/ml MgOE     | 21.97             |
|                  | 5 mg/ml MgOW     | 25.50             |
|                  | 5 mg/ml MgOC     | 31.13             |
|                  | <i>E. coli</i>   | 1 mg/ml MgOE      |
| 1 mg/ml MgOW     |                  | 14.48             |
| 1 mg/ml MgOC     |                  | 14.03             |
| 5 mg/ml MgOE     |                  | 23.17             |
| 5 mg/ml MgOW     |                  | 25.50             |
| 5 mg/ml MgOC     |                  | 28.69             |
