# Supplementary material for: Fabrication of magnesium oxide nanoparticles by solvent alteration and their bactericidal applications
Source: Royal Society of Chemistry journal article supplement (doi:10.1039/c9tb00782b), 2019-01-01
Supplement: c9tb00782b2.xlsx [file c9tb00782b2.xlsx]

## Sheet: Saureus_MgOC
Equation	y = A2 + (A1-A2)/(1 + (x/x0)^p)					Equation	y = A2 + (A1-A2)/(1 + (x/x0)^p)					Equation	y = A2 + (A1-A2)/(1 + (x/x0)^p)			standard deviation
Adj. R-Square		0.99119				Adj. R-Square		0.9956				Adj. R-Square		0.994522							0.9937
		Value						Value						Value
5mg/ml	A1	0.44253				5mg/ml	A1	0.465807				5mg/ml	A1	0.431049		0.0177094
5mg/ml	A2	1.30093				5mg/ml	A2	1.36936				5mg/ml	A2	1.26718		0.0520612
5mg/ml	x0	8.66901				5mg/ml	x0	9.125				5mg/ml	x0	8.44411		0.34692
5mg/ml	p	2.14128				5mg/ml	p	2.25391				5mg/ml	p	2.08573		0.0856906
2 mg/ml	A1	0.47211				2 mg/ml	A1	0.496943				2 mg/ml	A1	0.459862		0.0188931
2 mg/ml	A2	2.62012				2 mg/ml	A2	2.75794				2 mg/ml	A2	2.55215		0.104853
2 mg/ml	x0	6.49757				2 mg/ml	x0	6.4118				2 mg/ml	x0	6.329		0.0842882
2 mg/ml	p	4.39088				2 mg/ml	p	4.33292				2 mg/ml	p	4.62825		0.0546
1 mg/ml	A1	0.46519				1 mg/ml	A1	0.459049				1 mg/ml	A1	0.490338		0.0165784
1 mg/ml	A2	1.68747				1 mg/ml	A2	1.6652				1 mg/ml	A2	1.77869		0.0601379
1 mg/ml	x0	8.09822				1 mg/ml	x0	7.99132				1 mg/ml	x0	8.536		0.288604
1 mg/ml	p	2.96198				1 mg/ml	p	2.92288				1 mg/ml	p	3.1221		0.085
control	A1	0.47967				control	A1	0.473338				control	A1	0.5056		0.0170944
control	A2	1.85326				control	A2	1.85048				control	A2	1.95345		0.0586609
control	x0	8.57676				control	x0	8.56389				control	x0	8.4987		0.0418498
control	p	2.70255				control	p	2.6985				control	p	2.67795		0.0131869
3 mg/ml	A1	0.49328				3 mg/ml	A1	0.49254				3 mg/ml	A1	0.488791		0.00240693
3 mg/ml	A2	2.12289				3 mg/ml	A2	2.11971				3 mg/ml	A2	2.10357		0.0796
3 mg/ml	x0	7.54305				3 mg/ml	x0	7.53174				3 mg/ml	x0	7.4744		0.0368058
3 mg/ml	p	3.58844				3 mg/ml	p	3.5216				3 mg/ml	p	3.615		0.0481258

## Sheet: Saureus_MgOE
Equation	y = A2 + (A1-A2)/(1 + (x/x0)^p)					Equation	y = A2 + (A1-A2)/(1 + (x/x0)^p)					Equation	y = A2 + (A1-A2)/(1 + (x/x0)^p)				standard deviation
Adj. R-Square			0.99483			Adj. R-Square			0.99543			Adj. R-Square			0.996529						0.9955
		Value						Value						Value
5 mg/ml	A1	0.46386				5 mg/ml	A1	0.47592				5 mg/ml	A1	0.443719			0.0162687
5 mg/ml	A2	0.94582				5 mg/ml	A2	0.970411				5 mg/ml	A2	0.904752			0.0331722
5 mg/ml	x0	9.34587				5 mg/ml	x0	9.58886				5 mg/ml	x0	8.94007			0.327782
5 mg/ml	p	2.98664				5 mg/ml	p	2.9865				5 mg/ml	p	2.85696			0.0748303
control	A1	0.49886				control	A1	0.51183				control	A1	0.53171			0.0165458
control	A2	2.57426				control	A2	2.46758				control	A2	2.74378			0.139283
control	x0	6.66738				control	x0	6.39108				control	x0	7.10643			0.360747
control	p	4.01877				control	p	3.85223				control	p	4.28341			0.21744
1 mg/ml	A1	0.491				1 mg/ml	A1	0.470653				1 mg/ml	A1	0.523333			0.0265661
1 mg/ml	A2	2.24409				1 mg/ml	A2	2.15109				1 mg/ml	A2	2.39186			0.121419
1 mg/ml	x0	7.4163				1 mg/ml	x0	7.10897				1 mg/ml	x0	7.90467			0.401268
1 mg/ml	p	4.82513				1 mg/ml	p	4.62518				1 mg/ml	p	5.14287			0.261069
2 mg/ml	A1	0.48				2 mg/ml	A1	0.477888				2 mg/ml	A1	0.501725			0.013195
2 mg/ml	A2	1.98				2 mg/ml	A2	1.97129				2 mg/ml	A2	2.06962			0.0544292
2 mg/ml	x0	7.25				2 mg/ml	x0	7.2181				2 mg/ml	x0	7.57814			0.199299
2 mg/ml	p	3				2 mg/ml	p	2.9868				2 mg/ml	p	3.13578			0.0824685
3 mg/ml	A1	0.48873				3 mg/ml	A1	0.48658				3 mg/ml	A1	0.51085			0.0134349
3 mg/ml	A2	1.55791				3 mg/ml	A2	1.55106				3 mg/ml	A2	1.62842			0.0428262
3 mg/ml	x0	7.90259				3 mg/ml	x0	7.8596				3 mg/ml	x0	7.8569			0.0256353
3 mg/ml	p	5.91652				3 mg/ml	p	5.9632				3 mg/ml	p	5.89596			0.0344552

## Sheet: Saureus_MgOW
Equation	y = A2 + (A1-A2)/(1 + (x/x0)^p)					Equation	y = A2 + (A1-A2)/(1 + (x/x0)^p)					Equation	y = A2 + (A1-A2)/(1 + (x/x0)^p)				standard deviation
Adj. R-Square			0.99268			Adj. R-Square			0.99526			Adj. R-Square			0.99105						0.9929
		Value						Value						Value
5 mg/ml	A1	1.25				B	A1	1.23625				B	A1	1.263			0.0133768
5 mg/ml	A2	1.25				B	A2	1.23625				B	A2	1.245			0.00695971
5 mg/ml	x0	48				B	x0	47.472				B	x0	46.526			0.746813
5 mg/ml	p	3				B	p	2.967				B	p	3.2			0.126081
control	A1	0.55743				F1	A1	0.563071				F1	A1	0.569582			0.00608117
control	A2	2.10894				F1	A2	2.13028				F1	A2	2.15491			0.0230071
control	x0	7.69301				F1	x0	7.77086				F1	x0	7.52761			0.124224
control	p	4.01834				F1	p	4.05901				F1	p	3.93195			0.0648869
1 mg/ml	A1	0.54853				E1	A1	0.554081				E1	A1	0.536737			0.0088575
1 mg/ml	A2	1.82977				E1	A2	1.84829				E1	A2	1.79043			0.0295466
1 mg/ml	x0	8.80618				E1	x0	8.8953				E1	x0	8.61685			0.1422
1 mg/ml	p	3.11617				E1	p	3.14771				E1	p	3.04917			0.050319
2 mg/ml	A1	0.53874				D1	A1	0.556303				D1	A1	0.527157			0.0146748
2 mg/ml	A2	1.65786				D1	A2	1.71191				D1	A2	1.73289			0.038712
2 mg/ml	x0	8.24535				D1	x0	8.51415				D1	x0	8.61853			0.192534
2 mg/ml	p	3.67276				D1	p	3.79249				D1	p	3.83899			0.0857612
3 mg/ml	A1	0.52761				B	A1	0.54481				B	A1	0.55149			0.01232
3 mg/ml	A2	1.20387				B	A2	1.24312				B	A2	1.25836			0.0281111
3 mg/ml	x0	7.45692				B	x0	7.70002				B	x0	7.79442			0.174124
3 mg/ml	p	3.87408				B	p	4.00038				B	p	4.04942			0.0904621

## Sheet: Ecoli_MgOC
Equation	y = A2 + (A1-A2)/(1 + (x/x0)^p)					Equation	y = A2 + (A1-A2)/(1 + (x/x0)^p)					Equation	y = A2 + (A1-A2)/(1 + (x/x0)^p)				standard deviation
Adj. R-Square			0.97121			Adj. R-Square			0.97526			Adj. R-Square			0.970569					0.9723
		Value						Value						Value
5 mg/ml	A1	0.55884				B	A1	0.5485				B	A1	0.54856			0.00595256
5 mg/ml	A2	1.70449				B	A2	1.70569				B	A2	1.68989			0.00879621
5 mg/ml	x0	10.96				B	x0	10.9656				B	x0	10.9121			0.0293957
5 mg/ml	p	1.13289				B	p	1.15572				B	p	1.13062			0.0138832
control	A1	0.58644				F1	A1	0.59826				F1	A1	0.585267			0.00718662
control	A2	2.69123				F1	A2	2.86684				F1	A2	2.71841			0.0945239
control	x0	6.57125				F1	x0	7.00004				F1	x0	6.63762			0.230802
control	p	3.58389				F1	p	3.81775				F1	p	3.62009			0.125877
1 mg/ml	A1	0.60552				E1	A1	0.645032				E1	A1	0.611636			0.0212676
1 mg/ml	A2	2.22953				E1	A2	2.37501				E1	A2	2.25205			0.0783076
1 mg/ml	x0	7.67561				E1	x0	8.17646				E1	x0	7.59596			0.314691
1 mg/ml	p	3.48377				E1	p	3.7111				E1	p	3.44762			0.059
2 mg/ml	A1	0.59629				D1	A1	0.602328				D1	A1	0.590102			0.0061129
2 mg/ml	A2	2.24366				D1	A2	2.26638				D1	A2	2.22038			0.023001
2 mg/ml	x0	10.0347				D1	x0	10.1363				D1	x0	9.93054			0.102871
2 mg/ml	p	1.65949				D1	p	1.67629				D1	p	1.64227			0.0170124
3 mg/ml	A1	0.59398				C1	A1	0.599994				C1	A1	0.5895			0.00526587
3 mg/ml	A2	2.13632				C1	A2	2.1458				C1	A2	2.11256			0.0171236
3 mg/ml	x0	9.63277				C1	x0	9.59856				C1	x0	9.6959			0.0493808
3 mg/ml	p	1.55184				C1	p	1.52623				C1	p	1.54268			0.0129768

## Sheet: Ecoli_MgOE_
Equation	y = A2 + (A1-A2)/(1 + (x/x0)^p)					Equation	y = A2 + (A1-A2)/(1 + (x/x0)^p)					Equation	y = A2 + (A1-A2)/(1 + (x/x0)^p)				standard deviation
Adj. R-Square	0.9597					Adj. R-Square	0.9536					Adj. R-Square	0.9601
		Value						Value						Value					0.9578
control	A1	0.37478					A1	0.35965					A1	0.34856			0.0131618
control	A2	1.42059					A2	1.3958					A2	1.4159			0.0131691
control	x0	9.36644					x0	9.3126					x0	9.55682			0.128317
control	p	2.26913					p	2.21526					p	2.31525			0.0500467
1	A1	0.36953					A1	0.32569					A1	0.377041			0.0277347
1	A2	2.66641					A2	2.55964					A2	2.72061			0.0818995
1	x0	7.24729					x0	7.21595					x0	7.3946			0.0953915
1	p	1.81925					p	1.79658					p	1.85623			0.0301087
2	A1	0.36287					A1	0.37454					A1	0.370246			0.0059022
2	A2	2.27889					A2	2.35218					A2	2.32521			0.0370669
2	x0	6.76893					x0	6.98661					x0	7.04819			0.146721
2	p	1.73516					p	1.79096					p	1.80675			0.0376108
3	A1	0.39915					A1	0.411986					A1	0.415617			0.00865186
3	A2	1.9726					A2	2.03604					A2	2.05398			0.0427575
3	x0	7.1661					x0	7.32086					x0	7.46174			0.147877
3	p	2.93266					p	2.99599					p	3.05365			0.0605171
5	A1	0.3753					A1	0.383405					A1	0.390783			0.00774453
5	A2	1.89421					A2	1.93512					A2	1.852			0.0415604
5	x0	8.96093					x0	9.15445					x0	8.9645			0.110713
5	p	2.18442					p	2.23159					p	2.2569			0.0367858

## Sheet: Ecoli_MgOW
Equation	y = A2 + (A1-A2)/(1 + (x/x0)^p)					Equation	y = A2 + (A1-A2)/(1 + (x/x0)^p)					Equation	y = A2 + (A1-A2)/(1 + (x/x0)^p)				standard deviation
Adj. R-Square	0.98381					Adj. R-Square	0.9854					Adj. R-Square	0.98751							0.9855
		Value						Value						Value
control	A1	0.98612				control	A1	0.98546				control	A1	0.9846			0.00076219
control	A2	2.95333				control	A2	2.962				control	A2	2.946			0.00800935
control	x0	6.39746				control	x0	6.415				control	x0	6.348			0.0347442
control	p	3.70066				control	p	3.6985				control	p	3.715			0.00896801
1	A1	0.94928				1	A1	0.95312				1	A1	0.948			0.00266453
1	A2	2.64143				1	A2	2.6451				1	A2	2.62			0.0135568
1	x0	6.20509				1	x0	6.208				1	x0	6.2049			0.00173874
1	p	2.84377				1	p	2.8416				1	p	2.85216			0.00557696
2	A1	0.91693				2	A1	0.9164				2	A1	0.91213			0.00263166
2	A2	2.41776				2	A2	2.417				2	A2	2.4268			0.0054519
2	x0	6.96721				2	x0	6.9652				2	x0	6.91212			0.0312422
2	p	3.44529				2	p	3.446				2	p	3.34356			0.0589399
3	A1	0.88123				3	A1	0.8452				3	A1	0.82154			0.0300579
3	A2	2.26356				3	A2	2.2638				3	A2	2.28461			0.0120858
3	x0	8.36275				3	x0	8.349				3	x0	8.31597			0.0240454
3	p	2.94694				3	p	2.953				3	p	2.85965			0.0522342
5	A1	0.87893				5	A1	0.852				5	A1	0.832659			0.023239
5	A2	1.80291				5	A2	1.819				5	A2	1.85214			0.0251023
5	x0	8.67809				5	x0	8.629				5	x0	8.65859			0.0247172
5	p	3.45302				5	p	3.358				5	p	3.4956			0.0704457

## Sheet: Sheet7
standard deviation of p
s aureus		e coli
0.0856906		0.0500467
0.086		0.0301087
0.09		0.0376108
0.0131869		0.0605171
0.0481258		0.0367858
0.0748303		0.0138832
0.045		0.125877
0.0985		0.059
0.0824685		0.0170124
0.0344552		0.0129768
0.06569		0.00896801
0.0648869		0.00557696
0.050319		0.0589399
0.0857612		0.0522342
0.0904621		0.0704457
0.0676		0.0426
